# Supplementary material for: The importance of thinking beyond the water-supply in cholera epidemics: A historical urban case-study
Source: PLOS journal article supplement (doi:10.1371/journal.pntd.0006103), 2017-11-27
Supplement: S4 (10.1371/journal.pntd.0006103.s004) [file journal.pntd.0006103.s004]

# The importance of thinking beyond the water-supply in cholera epidemics: a historical urban case-study

*Matthew D. Phelps, Andrew S. Azman, Joseph A. Lewnard, Marina Antillón, Lone Simonsen, Viggo Andreasen, Peter K.M. Jensen, Virginia E. Pitzer.*

## S1 Supplemental Text

### 1.1 Model structure

We constructed a series of nested models where the force of infection acting upon neighborhood  $i$  was the sum of an internal force of infection,  $\beta_i$  and external force of infection from neighborhood  $j$  upon neighborhood  $i$ ,  $\alpha_{j,i}$ .

From simple to complex we allowed (1) a single  $\beta$  and single  $\alpha$  for all neighborhoods, such that  $\beta_i = \beta$  and  $\alpha_{j,i} = \alpha$ . (2) An individual  $\beta_i$  for each neighborhood and a single  $\alpha$  for all neighborhoods, such that  $\alpha_{j,i} = \alpha$ . (3) An individual  $\beta_i$  for each neighborhood and a single asymmetric  $\alpha_{i,j}$  for each neighborhood pair, such that  $\alpha_{j,i} \neq \alpha_{i,j}$ .

Two additional models were constructed that were not reported in the main text. In model 2.1 allowed an individual  $\beta_i$  and  $\alpha_i$  for each neighborhood, such that  $\alpha_{j,i} = \alpha_i$ . In model 2.2 we allowed an individual  $\beta_i$  for each neighborhood and symmetric  $\alpha_{j,i}$  for each neighborhood pair, such that  $\alpha_{j,i} = \alpha_{i,j}$ . These models were not supported by the model selection process.

Each model was based upon the following construction:

$${}^{new}\mathbf{I}_{i,t+1} \sim \text{Poisson} \left( \frac{S_{i,t}\phi}{N_i} (\beta_i I_{i,t} + \sum_{j \neq i} \alpha_{j,i} I_{j,t}) \right)$$

where:

${}^{new}\mathbf{I}_{i,t}$  = the number of reported new infectious cases in each neighborhood  $i$  at time  $t$   
 $I_{i,t}$  = the total number of infectious cases in each neighborhood  $i$  at time  $t$   
 $S_{i,t}$  = the number of susceptible people in each neighborhood  $i$  at time  $t$   
 $N_i$  = the total population of neighborhood  $i$   
 $\beta_i$  = the force of internal infection in neighborhood  $i$   
 $\alpha_{j,i}$  = the force of infection from neighborhood  $j$  to neighborhood  $i$ .  
 $\phi$  = the fraction of cases that are reported

The total number of cases  $I_{i,t}$  was updated via:

$$I_{i,t+1} = I_{i,t} + \frac{{}^{new}\mathbf{I}_{i,t}}{\phi} - R_{i,t}$$

where  $R_{i,t}$  = the number of people who recovered or died from infection.

The number of recovered individuals  $R_{i,t}$  was updated via:

$$R_{i,t+1} = \gamma I_{i,t}$$

where  $\frac{1}{\gamma}$  = the duration of infectiousness.

The number of susceptible  $S_{i,t}$  was updated via:

$$S_{i,t+1} = S_{i,t} - \frac{{}^{new}\mathbf{I}_{i,t}}{\phi}$$

The full system of model equations is thus:

$$\begin{aligned} S_{i,t+1} &= S_{i,t} - \frac{new I_{i,t}}{\phi} \\ I_{i,t+1} &= I_{i,t} + \frac{new I_{i,t}}{\phi} - R_{i,t} \\ R_{i,t+1} &= \gamma I_{i,t} \end{aligned}$$

## 1.2 Hydraulic connectivity and geographic proximity

To assess the effect of hydraulic connectivity we used two methods: (A) a linear regression, and (B) incorporating hydraulic and geographic connectivity into the meta-population model.

In method (A) we fit a linear model to the median of the log of the cross-neighborhood transmission coefficients ( $\alpha_{j,i}$ ) from the fully saturated model (model 3) using the hydraulic transition matrix and geographic proximity matrix as covariates. The model can be written as follows:

$$y = \beta_0 + \beta_1 x_1 + \beta_2 x_2$$

where  $y$  is a vector of the median of the log of the cross neighborhood transmission coefficients ( $\alpha_{i,j}$ ) and  $x_1$  is a vector of hydraulic connectivity (Table S1) defined as

$$x_1 \begin{cases} 0 & \text{if no water connection exists } j \rightarrow i \\ 1 & \text{if water connection exists } j \rightarrow i \end{cases}$$

and  $x_2$  is a vector of geographic proximity (Table S2) defined as

$$x_2 \begin{cases} 0 & \text{if no shared border exists } j \rightarrow i \\ 1 & \text{if shared border exists } j \rightarrow i \end{cases}$$

In method (B) we expanded model 2 to allow the force of infection ( $\alpha$ ) between two neighborhoods to vary depending on if the neighborhoods are connected via water pipes such that

$$\alpha_{j,i} \begin{cases} \alpha_0 & \text{if no water connection } j \rightarrow i \\ \alpha_0 + \alpha_1 & \text{if water connection } j \rightarrow i \end{cases}$$

creating model 2b. We then expanded model 2b to incorporate geographic proximity (model 2c) by adding an additional term  $\alpha_2$  if the neighborhoods shared a border. The resulting  $\alpha_{i,j}$  can be described as

$$\alpha_{j,i} \begin{cases} \alpha_0 & \text{if no shared border or water connection } j \rightarrow i \\ \alpha_0 + \alpha_1 & \text{if no shared border but water connection } j \rightarrow i \text{ exists} \\ \alpha_0 + \alpha_1 + \alpha_2 & \text{if shared border and water connection } j \rightarrow i \text{ exists} \end{cases}$$

The effect of water,  $\alpha_1$ , and the effect of the shared border,  $\alpha_2$ , are not fitted to each neighborhood, but are shared citywide.

### 1.3 Model fitting

The model used in the paper (model 3) was fit using JAGS 3.4 and the `runjags` and `rjags` libraries in R. The model priors were specified as thus:

$$\begin{aligned}
 {}^{new}I_{i,t+1} &\sim \text{Poisson} \left( \frac{S_{i,t}\phi}{N_i} (\beta_i I_{i,t} + \sum_{j \neq i} \alpha_{j,i} I_{j,t}) \right) \\
 \log(\alpha_{j,i}) &\sim N(\mu_1, \tau_1) \\
 \log(\beta_i) &\sim N(\mu_2, \tau_2) \\
 \mu_1 &\sim N(0, \frac{1}{0.001}) \\
 \mu_2 &\sim N(0, \frac{1}{0.001}) \\
 \tau_1 &\sim \Gamma(0.001, 0.001) \\
 \tau_2 &\sim \Gamma(0.001, 0.001) \\
 \text{logit}(\phi) &\sim N(0, \frac{1}{0.001}) \\
 \gamma &\sim \text{exp}(5)
 \end{aligned}$$

The Gamma distribution for  $\tau_1$  and  $\tau_2$  was parameterized in terms of shape and rate. The exponential distribution for  $\gamma$  was parameterized in terms of a rate.

### 1.4 Model selection

We used the Watanabe-Akaike information criterion (WAIC) for model selection where a difference of at least 5 was considered significant. Note models 2.1 and 2.2 are not reported in the main text.

| model 1 | model 2 | model 2b | model 2c | model 2.1 | model 2.2 | model 3 |
|---------|---------|----------|----------|-----------|-----------|---------|
| 4425    | 3902    | 3902     | 3902     | 3871      | 3846      | 3812    |
| 4302    | 3850    | 3850     | 3850     | 3832      | 3802      | 3744    |
| 4411    | 3943    | 3944     | 3944     | 3915      | 3891      | 3817    |
| 4292    | 3825    | 3824     | 3825     | 3806      | 3773      | 3740    |
| 4277    | 3799    | 3799     | 3799     | 3786      | 3744      | 3686    |
| 4415    | 3927    | 3927     | 3927     | 3909      | 3873      | 3834    |
| 4383    | 3891    | 3891     | 3891     | 3862      | 3834      | 3784    |
| 4485    | 4003    | 4003     | 4002     | 3976      | 3931      | 3909    |
| 4278    | 3821    | 3821     | 3821     | 3807      | 3767      | 3744    |
| 4504    | 3997    | 3997     | 3997     | 3980      | 3957      | 3920    |

For every realization of the epidemic, model 3 performed the best.

## 1.5 Posterior summary statistics

For the selected model, model 3 (fully saturated model), we calculated the median and standard deviation of the posterior distribution for all fitted parameters. The posterior median and standard deviation of  $\log(\beta_i)$  and  $\log(\alpha_{j,i})$  are in figure 1 and figure 2 respectively.

The posterior median (standard deviation) for  $\phi$  was 0.0987 (0.0011).

The posterior median (standard deviation) for  $\gamma$  was 0.2445 (0.0196)

**Posterior median of  $\log(\beta_i)$  and  $\log(\alpha_{j,i})$**

|                  |        |        |        |        |        |        |        |        |        |
|------------------|--------|--------|--------|--------|--------|--------|--------|--------|--------|
| Christianshavn   | -1.278 | -3.793 | -6.677 | -5.108 | -5.950 | -7.340 | -6.672 | -5.635 | -6.890 |
| Combined_lower   | -4.373 | -2.311 | -5.894 | -4.563 | -5.142 | -6.695 | -5.859 | -5.274 | -6.166 |
| Combined_upper   | -4.046 | -5.568 | -2.148 | -4.436 | -4.740 | -5.702 | -5.592 | -4.260 | -6.049 |
| Kjoebmager       | -2.888 | -6.059 | -5.473 | -2.552 | -4.352 | -6.296 | -5.967 | -4.626 | -6.126 |
| Nyboder          | -5.675 | -4.922 | -5.818 | -4.822 | -1.778 | -6.196 | -2.967 | -5.255 | -4.654 |
| Oester           | -5.124 | -3.836 | -4.966 | -5.232 | -5.531 | -2.973 | -5.829 | -0.184 | -5.884 |
| Rosenborg        | -5.819 | -5.695 | -4.630 | -5.287 | -5.333 | -5.735 | -1.831 | -5.639 | -4.351 |
| St. Annae Oester | -3.238 | -5.274 | -5.285 | -5.685 | -5.835 | -5.124 | -6.642 | -1.449 | -6.230 |
| St. Annae Vester | -4.624 | -6.726 | -4.660 | -5.086 | -2.752 | -3.696 | -5.943 | -2.336 | -0.914 |

Figure 1: The posterior medians for  $\log(\beta_i)$  (diagonal) and  $\log(\alpha_{j,i})$  (off-diagonal) for each neighborhood from model 3. For example, row 4 (Kjoebmager), column 1 (Christianshavn) can be read as the posterior median of the log transmission coefficient for cases arising in Kjoebmager from cases in Christianshavn

Posterior standard deviation of  $\log(\beta_i)$  and  $\log(\alpha_{j,i})$

|                  |        |        |        |        |        |        |        |        |        |
|------------------|--------|--------|--------|--------|--------|--------|--------|--------|--------|
| Christianshavn   | 0.3332 | 1.7675 | 1.7690 | 1.8646 | 1.9757 | 1.6579 | 1.7817 | 2.2406 | 1.7663 |
| Combined_lower   | 2.6137 | 0.4775 | 1.9951 | 2.0896 | 2.2472 | 1.7949 | 2.0054 | 2.4305 | 1.9654 |
| Combined_upper   | 2.7533 | 2.1072 | 0.5964 | 2.1897 | 2.3734 | 1.9791 | 2.1098 | 3.0609 | 2.0089 |
| Kjoebmager       | 2.9119 | 1.9965 | 2.1267 | 0.8095 | 2.4317 | 1.8924 | 2.0076 | 2.9529 | 1.9879 |
| Nyboder          | 2.0792 | 1.8114 | 1.9270 | 2.0276 | 0.3651 | 1.9055 | 0.8288 | 2.1431 | 2.2372 |
| Oester           | 2.5301 | 2.3251 | 2.3326 | 2.2205 | 2.2727 | 0.8719 | 2.0470 | 3.4616 | 2.0756 |
| Rosenborg        | 2.0838 | 2.0355 | 2.1908 | 2.1344 | 2.2438 | 2.0029 | 0.2552 | 2.2473 | 2.3944 |
| St. Annae Oester | 2.0041 | 1.8002 | 1.8115 | 1.8419 | 2.0562 | 1.9192 | 1.7768 | 0.4908 | 1.9310 |
| St. Annae Vester | 2.0710 | 1.7461 | 1.5261 | 1.5926 | 0.5522 | 0.8784 | 1.8145 | 1.9425 | 0.0714 |

Figure 2: The posterior standard deviations for  $\log(\beta_i)$  (diagonal) and  $\log(\alpha_{j,i})$  (off-diagonal) for each neighborhood from model 3.
